# Supplementary material for: Within outlying mean indexes: refining the OMI analysis for the realized niche decomposition
Source: PeerJ journal article supplement (doi:10.7717/peerj.3364), 2017-05-23
Supplement: Appendix_S1.pdf [file Appendix_S1.pdf]

## 1 APPENDIX S1: WITOMI CALCULATIONS

### 2 Species frequency table

3 Here and elsewhere, we follow the mathematical notations used by Dolédec et al. (2000). Let us extract  
 4  $\mathbf{Y}_K(k \text{ samples} \times t \text{ species})$ , from the faunistic table  $\mathbf{Y}(n \text{ samples} \times t \text{ species})$  with  $1 \leq k \leq n$ . Let us  
 5 transform subset  $\mathbf{Y}_K$  into a species profile table (noted  $\mathbf{Fr}_K$ ) that contains the frequency of species for  
 6 each SUs,  $f_{K_{i_s/j}}$  as follows:

$$f_{K_{i_s/j}} = \frac{y_{K_{i_s,j}}}{y_{K,j}} \quad 1 \leq i_s \leq k, 1 \leq j \leq t \quad (\text{S.1})$$

7 where  $y_{K_{i_s,j}}$  is the abundance of species  $j$  in SU  $i_s$  and  $y_{K,j}$  the column total of species  $j$  equal to

$$y_{K,j} = \sum_{i_s=1}^k y_{K_{i_s,j}} \quad (\text{S.2})$$

8 Then the species profile table  $\mathbf{Fr}^*$  concatenates  $\mathbf{Fr}_K$  as follows:

$$\mathbf{Fr}^* = \begin{bmatrix} \mathbf{Fr}_1 \\ \vdots \\ \mathbf{Fr}_K \\ \vdots \\ \mathbf{Fr}_N \end{bmatrix} \quad 1 \leq K \leq N \quad (\text{S.3})$$

9 with  $N$  the number of subsets.

### 10 Subniche parameters calculated from the origin $G$

11 The center of gravity ( $G$ ) of SUs is at the origin of the axes of the OMI analysis and corresponds to the  
 12 overall mean habitat conditions used by the taxa in the assemblage (Dolédec et al., 2000). Let us consider  
 13  $N$  subsets habitat conditions of the environmental table  $\mathbf{Z}_0$  equals to:

$$\mathbf{Z}_0 = \begin{bmatrix} \mathbf{Z}_1 \\ \vdots \\ \mathbf{Z}_K \\ \vdots \\ \mathbf{Z}_N \end{bmatrix} \quad 1 \leq K \leq N \quad (\text{S.4})$$

14 Let us extract  $\mathbf{Z}_K(k \times p)$ , a matrix of  $\mathbf{Z}_0(n \times p)$ , having  $k$  rows, with  $1 \leq i_s \leq k$  and  $p$  variables (Figure  
 15 3).

16 Let the faunistic frequency table,  $\mathbf{Fr}_K(k \times t)$  contains the frequency of  $t$  species in the  $k$  SUs.  $M_i$   
 17 represents SU  $i$  of table  $\mathbf{Z}_0$  in the multidimensional space  $\mathbb{R}^p$ . Let consider  $M_{K_{i_s}}$ , representing SU  $i_s$  of  
 18 table  $\mathbf{Z}_K$  in the same multidimensional space  $\mathbb{R}^p$ . The total inertia of table  $\mathbf{Z}_K$  equals:

$$I_{T_K} = \sum_{i_s=1}^k p_{K_{i_s}} \|M_{K_{i_s}}\|_{\mathbf{I}_p}^2 \quad (\text{S.5})$$

19 with  $p_{K_{i_s}}$  being the weight of SU  $i_s$ . The inertia of species  $j$  considering the matrix  $\mathbf{Z}_K$  equals:

$$I_{T_K}(j) = \sum_{i_s=1}^k f_{K_{i_s/j}} \|M_{K_{i_s}}\|_{\mathbf{I}_p}^2 \quad (\text{S.6})$$

20 The inertia  $I_{T_K}(j)$  represents the total inertia of  $\mathbf{Z}_K$  weighted by the species  $j$  profile. Similarly to the  
 21 proposal of Dolédec et al. (2000), the SUs  $i_s$  that do not have species  $j$  do not add to the species  $j$  inertia.  
 22 Let consider a  $\mathbf{I}_p$ -normed vector  $\mathbf{u}_K$  ( $\|\mathbf{u}_K\|_{\mathbf{I}_p}^2 = 1$ ). The projection of the  $k$  rows of the matrix  $\mathbf{Z}_K$  onto the  
 23 vector  $\mathbf{u}_K$  results in a vector of coordinates  $\mathbf{Z}_K\mathbf{u}_K$ . Therefore, the average position of species  $j$  on  $\mathbf{u}_K$ ,  
 24 equivalent to the center of gravity of species  $j$ , is defined as:

$$T_{K_j} = \mathbf{f}_K^\top \mathbf{Z}_K \mathbf{u}_K \quad \mathbf{f}_K^\top = (f_{K_{1/j}}, \dots, f_{K_{i_s/j}}, \dots, f_{K_{k/j}}). \quad (\text{S.7})$$

25 With Eq. S8, marginality within a subset of habitat conditions, or within-subset outlying mean index  
 26 (WitOMIG) of species  $j$  [noted  $m_{a_K}(j)$ ] along  $\mathbf{u}_K$  equals:

$$m_{a_K}(j) = T_{K_j}^2 = (\mathbf{f}_K | \mathbf{Z}_K \mathbf{u}_K)_{\mathbf{I}_p}^2 = (\mathbf{Z}_K^\top \mathbf{u}_K | \mathbf{f})_{\mathbf{I}_p}^2 \quad (\text{S.8})$$

27 This marginality represents the deviation between the average position of species  $j$  within subset  $K$   
 28 from the origin ( $G$ ). Also equivalent to the distance between the subset average habitat conditions used by  
 29 species ( $j$ ) and the overall average habitat conditions found in the area ( $G$ ).

30 From Eq. S9, the maximization of  $m_{a_K}(j)$  has for solution  $\mathbf{u}_K$  equal to:

$$\mathbf{u}_{K_j} = \frac{\mathbf{Z}_K^\top \mathbf{f}_K}{\|\mathbf{Z}_K^\top \mathbf{f}_K\|_{\mathbf{I}_p}}. \quad (\text{S.9})$$

31 Vector  $\mathbf{u}_{K_j}$ , defined the direction of the species  $j$ , within the subsets (marginality axis of species  $j$   
 32 within subset  $K$ ), for which the average position of species  $j$  within subset  $K$  is as far as possible from the  
 33 overall average habitat conditions ( $G$ ).

34 In addition, the dispersion or tolerance [noted  $T_{m_K}(j)$ ] of SUs  $i_s$  which contains species  $j$ , can be  
 35 calculated. Let  $m_{K_{i_s}}$  be the projection of  $M_{K_{i_s}}$ , onto the marginality axis, as follows:

$$T_{m_K}(j) = \sum_{i_s=1}^k f_{K_{i_s/j}} \|G_{K_j} - m_{K_{i_s}}\|_{\mathbf{I}_p}^2 \quad (\text{S.10})$$

36  $T_{m_K}(j)$  represents the subniche breadth of species  $j$  under the habitat conditions defined by  $\mathbf{Z}_K$ .  
 37 Finally, similarly to the proposal of Dolédec et al. (2000), the projection of the SUs of subset  $K$  onto the  
 38 plane orthogonal to the marginality axis returns a residual tolerance [noted  $T_{r_K}(j)$ ] and the decomposition  
 39 of the species  $j$  total inertia under the subset habitat conditions can be written as follows:

$$I_{T_K}(j) = m_{a_K}(j) + T_{m_K}(j) + T_{r_K}(j) \quad (\text{S.11})$$

40 The niche variability of the species  $j$  thus comprises of the three components advocated by Dolédec  
 41 et al. (2000): (1) an index of marginality or WitOMIG, *i.e.*, the average distance of species  $j$  within subsets  
 42 to the uniform distribution found in the sampling domain ( $G$ ); (2) an index of tolerance or subniche  
 43 breadth and (3) a residual tolerance, *i.e.*, an index that helps to determine the reliability of the subset  
 44 habitat conditions for the definition of the subniche of species  $j$ .

45 Furthermore the total species inertia  $I_T(j)$  calculated in Dolédec et al. (2000), can be recalculated  
 46 using the inertia of species  $I_{T_K}(j)$  as follows:

$$I_T(j) = \sqrt{\sum_{K=1}^N (I_{T_K}(j) \times \frac{y_{K,j}}{y_{.j}})^2} \quad (\text{S.12})$$

47 where  $y_{.j}$  corresponds to the total species  $j$  abundance in the faunistic table  $\mathbf{Y}$ .

48 **Subniche parameters calculated from a sub-origin  $G_K$**

49 In the previous section, the subniche parameters are estimated considering the average habitat conditions  
50 ( $G$ ) used by the all species in the assemblage. The subniche parameters can also use the average subset  
51 habitat conditions ( $G_K$ ) and the corresponding subsets of species.

52 Let us consider again the matrices  $\mathbf{Z}_K$ , which are centered using their respective mean to yield  $\mathbf{Z}_{K^*}$ ,  
53 thus making the global table  $\mathbf{Z}^*$ :

$$\mathbf{Z}^* = \begin{bmatrix} \mathbf{Z}_{1^*} \\ \vdots \\ \mathbf{Z}_{K^*} \\ \vdots \\ \mathbf{Z}_{N^*} \end{bmatrix} \quad (\text{S.13})$$

54 Let us consider again the faunistic table,  $\mathbf{Fr}_K(k \times t)$  that contains the species frequency (Figure 3).  
55 The equations are the same as previously but considering the  $N$  centered subset habitat conditions  $\mathbf{Z}_{K^*}$   
56 (Details in the Appendix S1). We obtain similarly the total inertia of  $\mathbf{Z}_{K^*}$ ,  $I_{T_{K^*}}$ , and the inertia of species  
57  $j$ ,  $I_{T_{K^*}}(j)$ , can be decomposed into its marginality or WitOMIG $_K$ ,  $m_{a_{K^*}}(j)$ , its tolerance  $T_{m_{K^*}}(j)$  and its  
58 residual tolerance  $T_{r_{K^*}}(j)$ .

59 Let us extract  $\mathbf{Z}_{K^*}(k \times p)$ , a matrix of  $\mathbf{Z}^*(n \times p)$  with  $k$  rows. Let the faunistic table,  $\mathbf{Fr}_K(k \times t)$   
60 contain the frequency of  $t$  species in the  $k$  SUs. Let  $M_{i_s}$  represent SU  $i_s$  of table  $\mathbf{Z}_{K^*}(k \times p)$  in the  
61 multidimensional space  $\mathbb{R}^p$ . Let  $M_{K_{i_s}^*}$  represent the SU  $i_s$  subset habitat conditions of table  $\mathbf{Z}_{K^*}$  in the  
62 same multidimensional space  $\mathbb{R}^p$ . The total inertia of the matrix  $\mathbf{Z}_{K^*}$ , equals:

$$I_{T_{K^*}} = \sum_{i_s=1}^k p_{K_{i_s}^*} \| M_{K_{i_s}^*} \|_{\mathbf{I}_p}^2 \quad (\text{S.14})$$

63 with  $p_{K_{i_s}^*}$  being the weight of SU  $i_s$ . The inertia of species  $j$  considering the matrix  $\mathbf{Z}_{K^*}$  equals:

$$I_{T_{K^*}}(j) = \sum_{i_s=1}^k f_{K_{i_s}/j} \| M_{K_{i_s}^*} \|_{\mathbf{I}_p}^2 \quad (\text{S.15})$$

64 The inertia  $I_{T_{K^*}}(j)$  represents the inertia weighted by the species profile  $j$ . The SUs  $i_s$  that do not have  
65 species  $j$  do not add to the species  $j$  inertia. Let us consider a  $\mathbf{I}_p$  normed vector  $\mathbf{u}_{K^*}$  ( $\| \mathbf{u}_{K^*} \|_{\mathbf{I}_p}^2 = 1$ ). The  
66 projection of the  $k$  rows of the matrix  $\mathbf{Z}_{K^*}$  onto the vector  $\mathbf{u}_{K^*}$  results in a vector of coordinates  $\mathbf{Z}_{K^*} \mathbf{u}_{K^*}$ .  
67 Therefore, the average position of species  $j$  on  $\mathbf{u}_{K^*}$ , equivalent to the center of gravity of species  $j$  within  
68 a subset of habitat conditions is defined as:

$$T_{K^*} = \mathbf{f}_K^\top \mathbf{Z}_{K^*} \mathbf{u}_{K^*} \quad \mathbf{f}_K^\top = (f_{K_{1/j}}, \dots, f_{K_{i_s/j}}, \dots, f_{K_{k/j}}). \quad (\text{S.16})$$

69 With the Eq. S19, marginality within a subset of habitat conditions, or within subset outlying mean  
70 index to  $G_K$  (WitOMIG $_K$ ) of species  $j$  [noted  $m_{a_{K^*}}(j)$ ] along  $\mathbf{u}_{K^*}$  equals:

$$m_{a_{K^*}}(j) = T_{K^*}^2 = (\mathbf{f}_K | \mathbf{Z}_{K^*} \mathbf{u}_{K^*})_{\mathbf{I}_p}^2 = (\mathbf{Z}_{K^*}^\top \mathbf{u}_{K^*} | \mathbf{f}_K)_{\mathbf{I}_p}^2 \quad (\text{S.17})$$

71 This marginality represents the deviation between the average position of species  $j$  within subsets  
72 from the subset habitat origin ( $G_K$ ). Also equivalent to the distance between the average subset habitat  
73 conditions used by species  $j$  and the average subset habitat conditions of the subset area.

74 From Eq. S20, the maximization of  $m_{a_{K^*}}(j)$  as for solution  $\mathbf{u}_{K^*}$ :

$$\mathbf{u}_{K^*}^j = \frac{\mathbf{Z}_{K^*}^\top \mathbf{f}_K}{\| \mathbf{Z}_{K^*}^\top \mathbf{f}_K \|_{\mathbf{I}_p}}. \quad (\text{S.18})$$

75 Vector  $\mathbf{u}_{K^*j}$ , defined the direction of the species  $j$ , within the subsets (marginality axis of species  $j$   
 76 within the subsets), for which the average position of species  $j$  within subsets is as far as possible from  
 77 the subset habitat conditions found in the area  $G_K$ .

78 In addition, the dispersion or tolerance [noted  $T_{m_{K^*}}(j)$ ] of SUs  $i_s$  that contains species  $j$  can be  
 79 calculated. Let  $m_{K^*i_s}$  be the projection of  $M_{K^*i_s}$ , onto the marginality axis as follows:

$$T_{m_{K^*}}(j) = \sum_{i_s=1}^k f_{K^*i_s/j} \| G_{K^*j} - m_{K^*i_s} \|^2_{\mathbf{I}_p} \quad (\text{S.19})$$

80  $T_{m_{K^*}}(j)$  represents the subniche breadth of species  $j$  under the subset habitat conditions defined by  
 81  $\mathbf{Z}_{K^*}$ . Similarly to the proposal of (Dolédec et al., 2000), the projection of the  $k$  SUs of subset  $K$  onto the  
 82 plane orthogonal to the marginality axis returns a residual tolerance [noted  $T_{r_{K^*}}(j)$ ] and the decomposition  
 83 of the species  $j$  total inertia under the subset habitat conditions equals:

$$I_{T_{K^*}}(j) = m_{a_{K^*}}(j) + T_{m_{K^*}}(j) + T_{r_{K^*}}(j) \quad (\text{S.20})$$

84

## 85 REFERENCES

86 Dolédec, S., Chessel, D., and Gimaret-Carpentier, C. (2000). Niche separation in community analysis: A  
 87 new method. *Ecology*, 81(10):2914.
